# Supplementary material
Source: PubMed Central journal article supplement (PMC3716122)
Supplement: AAC.00044-13_zac999101887so1.pdf [file AAC.00044-13_zac999101887so1.pdf]

## Supporting information for...

### **Metabolomics guides rational development of a simplified cell culture medium for drug screening against *Trypanosoma brucei***

**Darren J Creek<sup>1,2</sup>, Brunda Nijagal<sup>1\*</sup>, Dong-Hyun Kim<sup>1</sup>, Federico Rojas<sup>3</sup>, Keith R Matthews<sup>3</sup>, and Michael P Barrett<sup>1,4#</sup>**

<sup>1</sup> Wellcome Trust Centre for Molecular Parasitology, Institute of Infection, Immunity and Inflammation, College of Medical, Veterinary and Life Sciences, University of Glasgow, Glasgow, G12 8TA, UK

<sup>2</sup> Department of Biochemistry and Molecular Biology, Bio21 Molecular Science and Biotechnology Institute, University of Melbourne, Flemington Rd, Parkville, Victoria, 3010, Australia.

<sup>3</sup>Centre for Immunity, Infection and Evolution, Institute of Immunology and Infection Research, School of Biological Sciences, University of Edinburgh, King's Building, West Mains Road, Edinburgh EH9 3JT. UK

<sup>4</sup> Glasgow Polyomics, College of Medical, Veterinary and Life Sciences, University of Glasgow, Glasgow, G12 8TA, UK

#For correspondence. E-mail: michael.barrett@glasgow.ac.uk; Tel: +44 141 330 6904; Fax: +44 141 330 4600.

Running title: Simplified culture medium for *T. brucei* drug screening

Keywords: Metabolomics, *Trypanosoma brucei*, cell culture, medium, drug screening, mode of action

\* Current address: Metabolomics Australia, Bio21 Molecular Science and Biotechnology Institute, University of Melbourne, Flemington Rd, Parkville, Victoria, 3010, Australia.

## Supplementary Figures:

### Supplementary Figure 1:

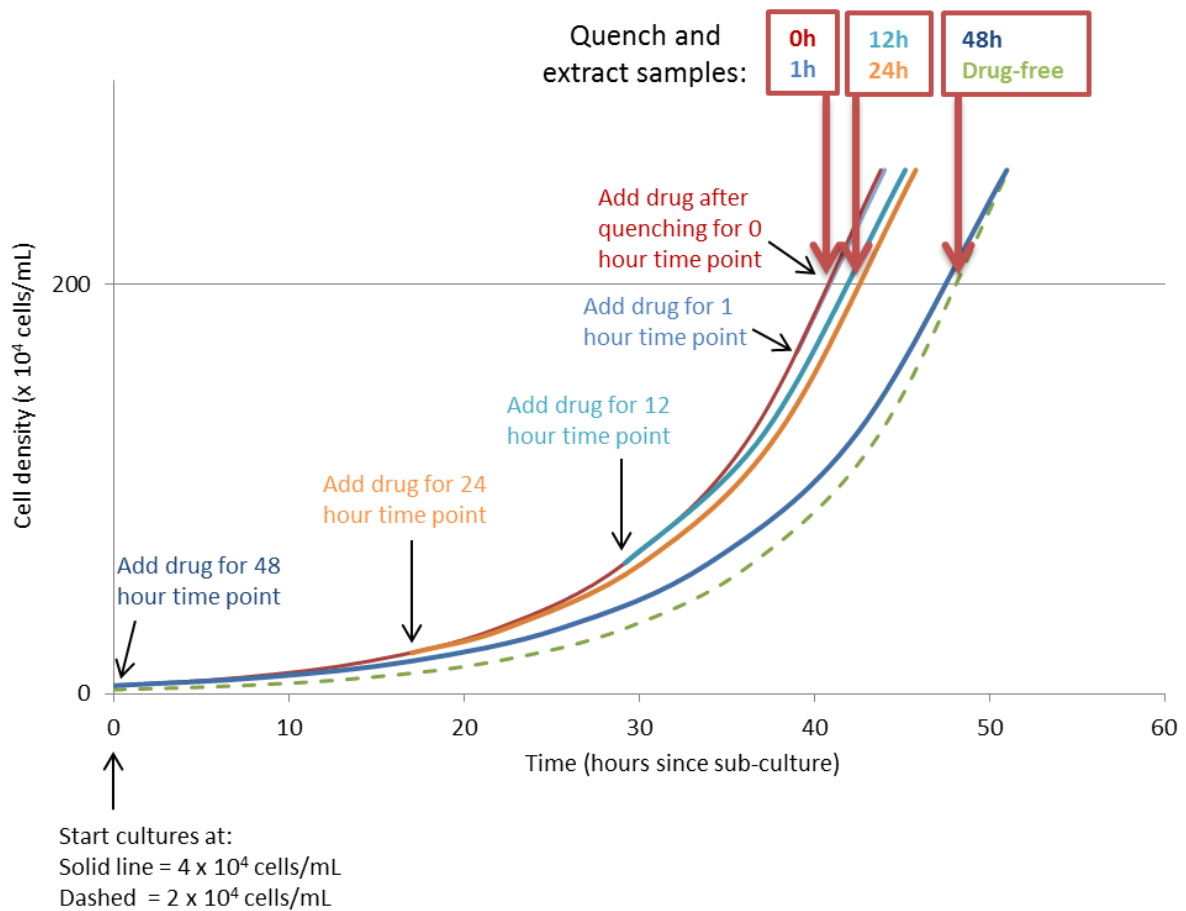

Supplementary Figure 1: Schematic describing the sampling methodology for pentamidine metabolomics study. Drug was added at set time points to ensure final cell cultures were all at the same cell density for metabolomics sampling. A second drug-free control was included by seeding a culture at lower cell density to reach the sampling density at the same time as the 48 hour treated culture.

Supplementary Figure 2:

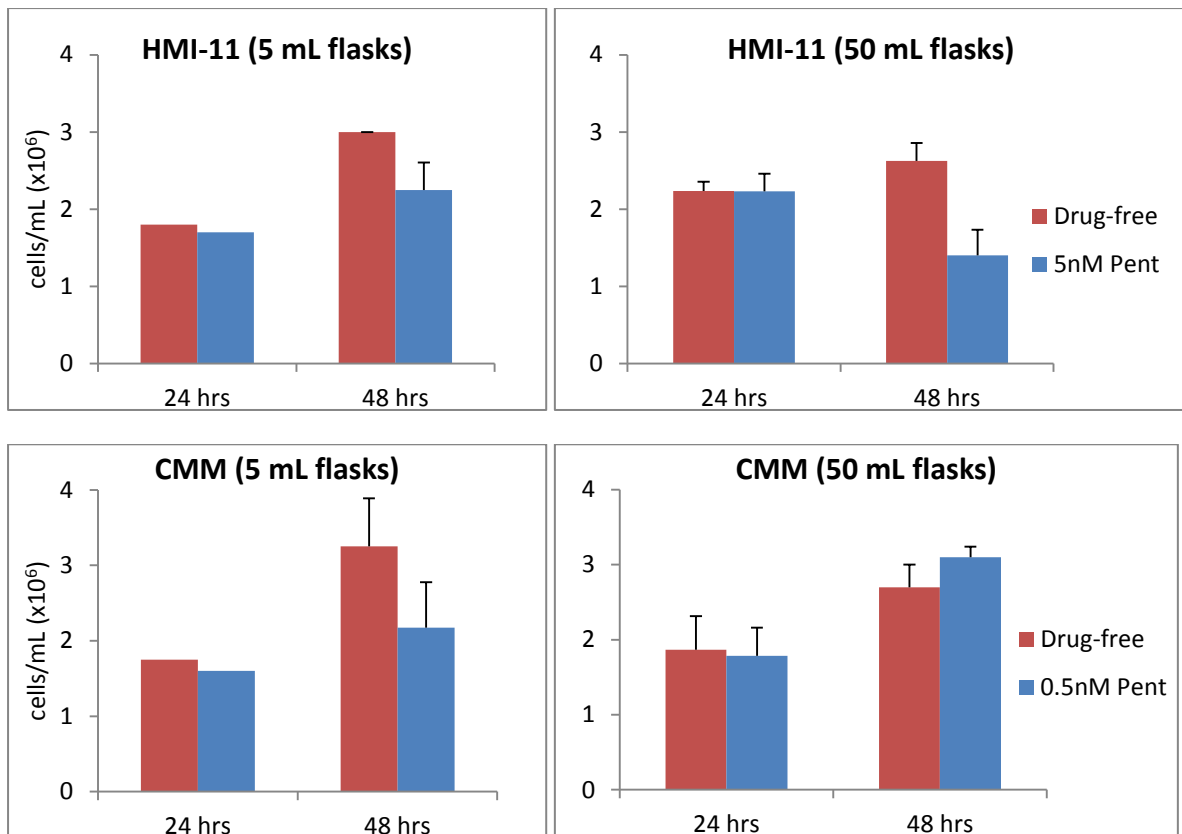

Supplementary Figure 2: Effect of pentamidine on cell growth after 24 or 48 hours in CMM or HMI11. Pentamidine concentration was 5 nM in HMI11 and 0.5 nM in CMM.

## Data Deposition

The three sets of metabolomics data, including fully functional IDEOM files, are deposited in the Metabolights database (<http://www.ebi.ac.uk/metabolights/>). Further information to assist with interpretation metabolite data in the IDEOM files is available from the IDEOM help file ([http://mzmatch.sourceforge.net/ideom/Viewing\\_results\\_with\\_Ideom.pdf](http://mzmatch.sourceforge.net/ideom/Viewing_results_with_Ideom.pdf)).

1. Extracellular (supernatant) metabolite data from HMI11 and CMM following *T. brucei* growth from  $2 \times 10^4$  to  $4 \times 10^6$  cells.mL<sup>-1</sup> over 56 hours.
2. Intracellular metabolite data from *T. brucei* grown in HMI11 and CMM during growth from cell density of  $2 \times 10^6$  to  $4 \times 10^6$  cells.mL<sup>-1</sup> over 8 hours.
3. Intracellular metabolite data from pentamidine-treated cells in HMI11 and CMM over 48 hours.
